# Supplementary material for: Immobilization of soybean peroxidase enzyme on hierarchical zeolite-ordered mesoporous carbon nanocomposite and its activity
Source: Royal Society of Chemistry journal article supplement (doi:10.1039/d4ra07503j), 2025-01-01
Supplement: d4ra07503j1.pdf [file d4ra07503j1.pdf]

## 1 Supporting Information

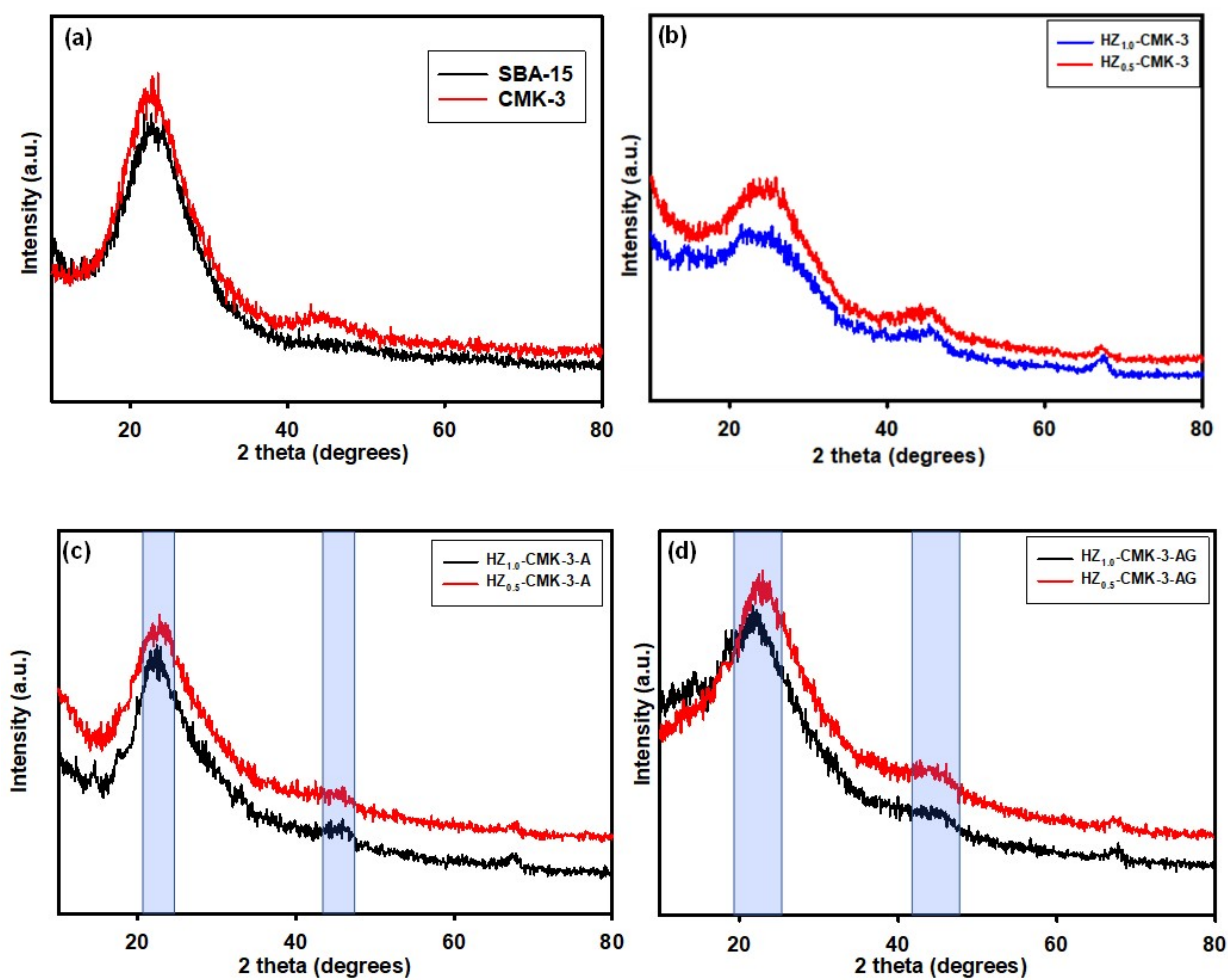

**Fig. S1.** High angle XRD patterns of (a) SBA-15, CMK-3, (b) nanocomposite of hierarchical SAPO/CMK-3, (c) After APTES modification, (d) After Crosslinking with GA.
